# Supplementary material for: Phosphodiesterase 2 inhibition preferentially promotes NO/guanylyl cyclase/cGMP signaling to reverse the development of heart failure
Source: PubMed Central journal article supplement — Proc Natl Acad Sci U S A. 2018 Jul 16;115(31):E7428–37. doi: 10.1073/pnas.1800996115 (PMC6077693; doi:10.1073/pnas.1800996115), 2018-07-16
Supplement: pnas.1800996115.sapp.pdf [file pnas.1800996115.sapp.pdf]

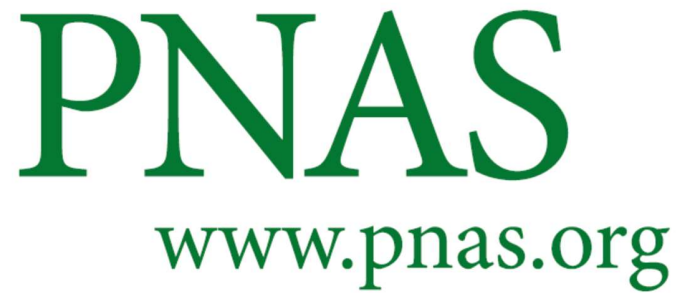

Supplementary Information for

**Phosphodiesterase 2 inhibition preferentially promotes NO-guanylyl cyclase-cGMP signaling to reverse the development of heart failure**

\*Reshma S. Baliga, \*Michael E.J. Preedy, Matthew S. Dukinfield, Sandy M. Chu, Aisah A. Aubdool, Kristen J. Bubb, Amie J. Moyes, Michael A. Tones & Adrian J. Hobbs

Professor Adrian J Hobbs  
Email: [a.j.hobbs@qmul.ac.uk](mailto:a.j.hobbs@qmul.ac.uk)

**This PDF file includes:**

Figures S1 to S8  
Tables S1 to S4

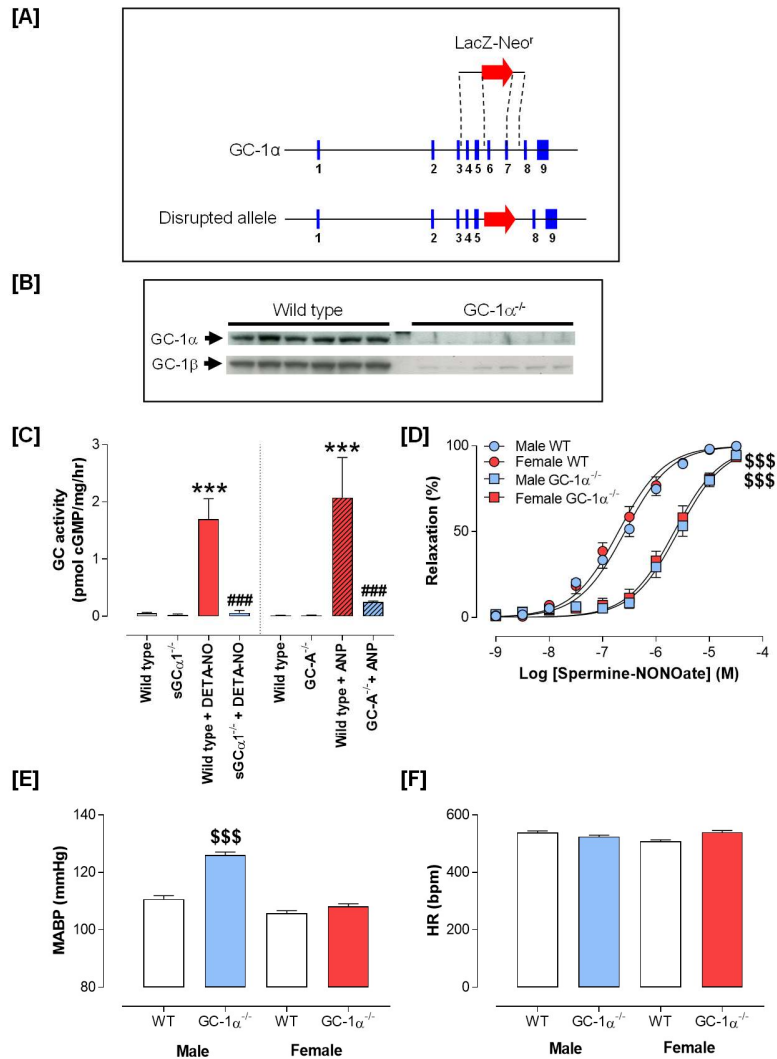

**Figure S1. Design and verification of GC-1 $\alpha$  and GC-A gene deletion.** (A) The targeting vector comprised a LacZ-Neor<sup>r</sup> cassette flanked by sequences on either side of exons 6 and 7 resulting in deletion of the cyclase domain. (B) Immunoblot of GC-1 $\alpha$  and GC-1 $\beta$  subunits in soluble lung extracts showing complete deletion of the GC-1 $\alpha$  protein (and significant reduction in GC-1 $\beta$ ). (C) Guanylyl cyclase activity is markedly reduced in soluble lung extracts from sGC1 $\alpha$ <sup>-/-</sup> and GC-A<sup>-/-</sup> mice stimulated with DETA-NONOate (100  $\mu$ M) and ANP (1  $\mu$ M), respectively. (D) The vasorelaxant potency of the NO-donor Spermine-NONOate is significantly reduced in aortic rings from male and female GC-1 $\alpha$ <sup>-/-</sup> mice. (E) Mean arterial blood pressure (MABP) is increased in male, but not female, GC-1 $\alpha$ <sup>-/-</sup> animals. (F) Heart rate (HR) is similar in WT and GC-1 $\alpha$ <sup>-/-</sup> mice. Data are expressed as mean $\pm$ sem with analysis by one-way ANOVA with Bonferroni post hoc test or two-way ANOVA. \*\*\*p<0.001 v basal, ###p<0.001 v WT + DETA-NONOate or ANP, \$\$\$p<0.001 v corresponding WT. n=6.

[A]

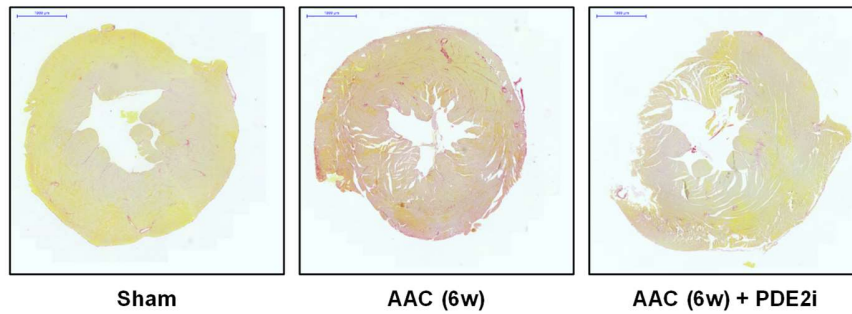

[B]

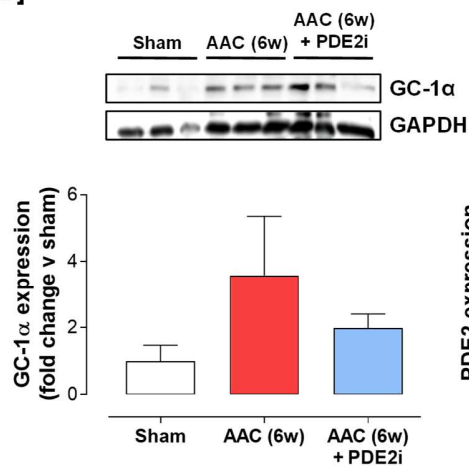

[C]

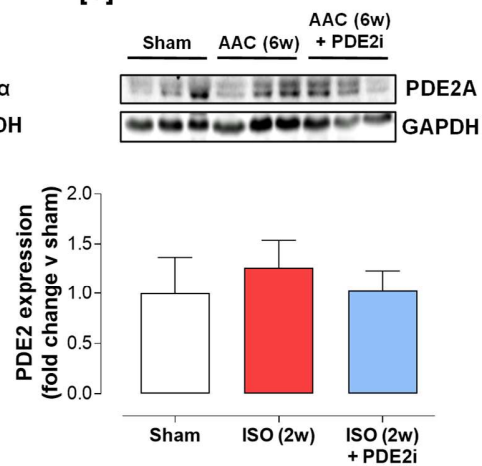

**Figure S2. Effects of PDE2 inhibition on cardiac fibrosis, GC-1 $\alpha$  and PDE2A expression.** (A) Representative images of whole heart fibrotic burden and (B) GC-1 $\alpha$  expression in sham mice and animals undergoing abdominal aortic constriction (AAC) for 6 weeks (6w) in the absence and presence of BAY 60-7550 (10 mg/kg/day; p.o.; initiated at 3w). (C) PDE2A expression in sham mice and animals administered isoproterenol (20mg/kg/day; s.c.) for 2 weeks in the absence and presence of BAY 60-7550 (10 mg/kg/day; p.o.; initiated at 1w). Data are expressed as mean $\pm$ sem. n=3.

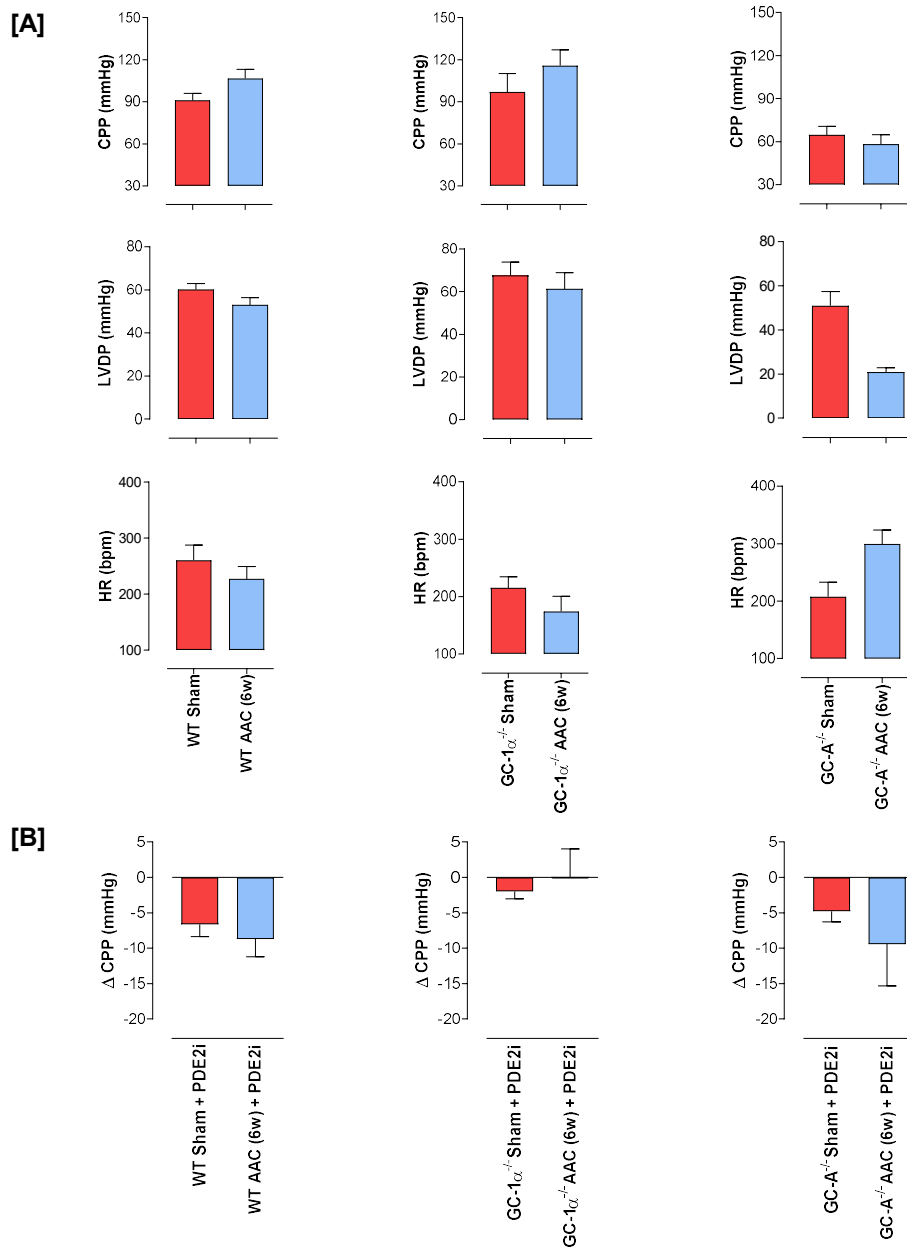

**Figure S3. Characteristic cardiac dysfunction in Langendorff hearts from mice subjected to AAC.** (A) Coronary perfusion pressure (CPP), left ventricular developed pressure (LVDP) and heart rate (HR) in WT, GC-1 $\alpha$ <sup>-/-</sup> or GC-A<sup>-/-</sup> sham animals or mice subjected to 6 weeks of abdominal aortic constriction (AAC) in the absence and presence of BAY 60-7550 (10 mg/kg/day; p.o.; initiated at 3w). (B) Changes ( $\Delta$ ) in CPP in response to BAY 60-7550 (100 nM) in WT, GC-1 $\alpha$ <sup>-/-</sup> or GC-A<sup>-/-</sup> sham animals or mice subjected to 6 weeks of abdominal aortic constriction (AAC). Data are expressed as mean $\pm$ sem. n=6-12.

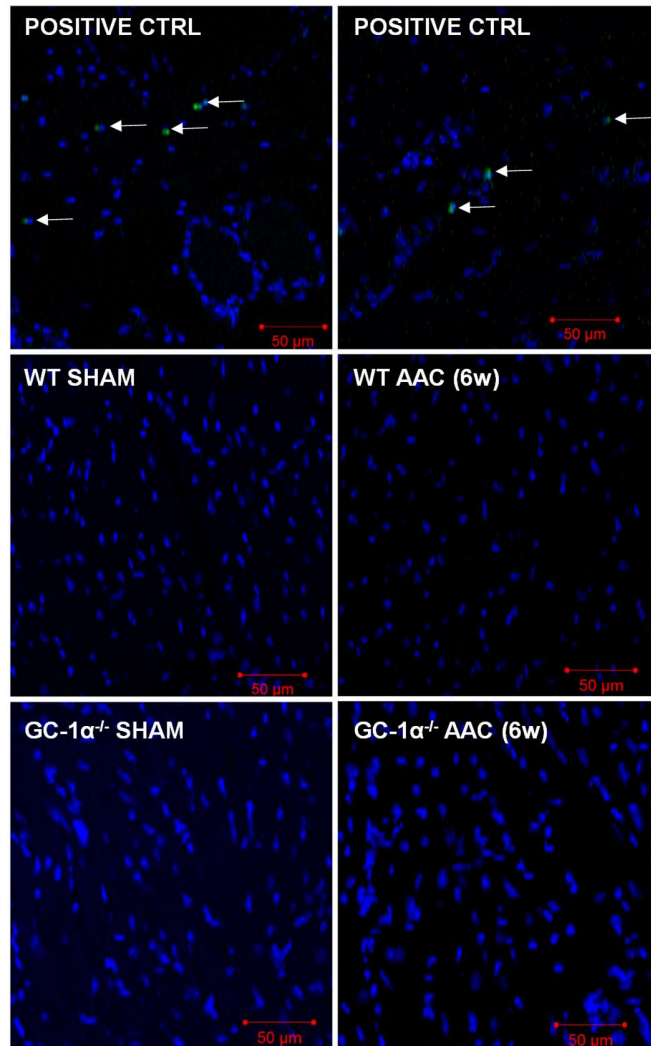

**Figure S4. The increased cardiomyocyte size in GC-1 $\alpha^{-/-}$  mice is not due to apoptosis.** Representative images depicting terminal deoxynucleotidyl transferase (TdT) dUTP Nick-End Labeling (TUNEL)-staining of heart sections from wild type (WT) and GC-1 $\alpha^{-/-}$  sham mice and animals undergoing abdominal aortic constriction (AAC) for 6 weeks. Positive apoptotic control shown in the upper panel.

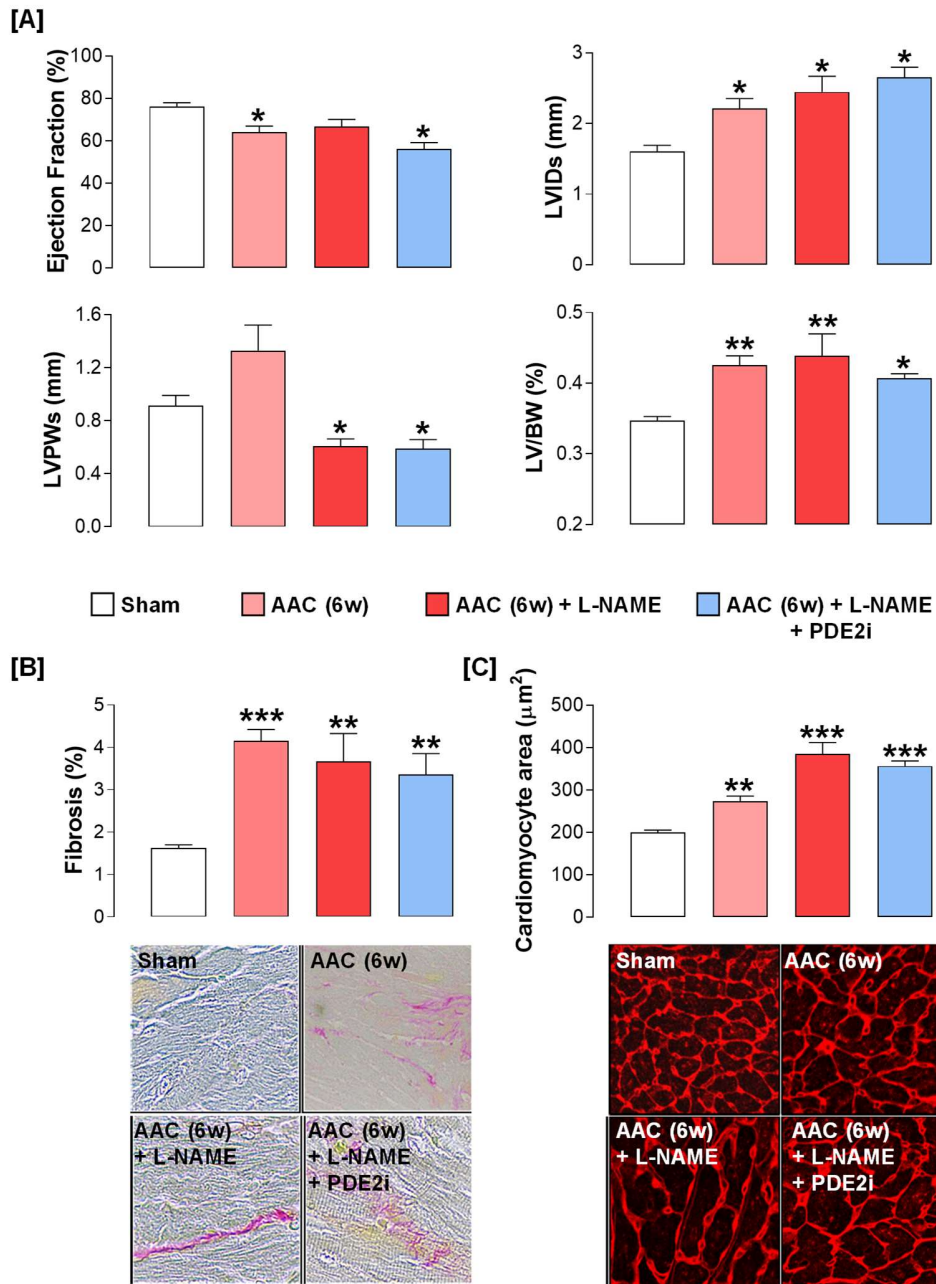

**Figure S5. Treatment with a NOS inhibitor ameliorates the beneficial effects of PDE2 inhibition in HF.** (A) Echocardiographic indices of heart structure & function, (B) cardiac fibrosis, and (C) cardiomyocyte size in sham mice and animals undergoing abdominal aortic constriction (AAC) for 6 weeks (6w) with administration of the NOS inhibitor L-N<sup>G</sup>-nitroarginine methylester (L-NAME; 100 mg/kg/day; p.o.) in the absence and presence of BAY 60-7550 (10 mg/kg/day; p.o.; initiated at 3w). Data are expressed as mean±sem and analyzed by one-way ANOVA with Bonferroni post hoc test. \* $p < 0.05$ , \*\* $p < 0.01$ , \*\*\* $p < 0.001$  v sham.  $n = 6-12$ .

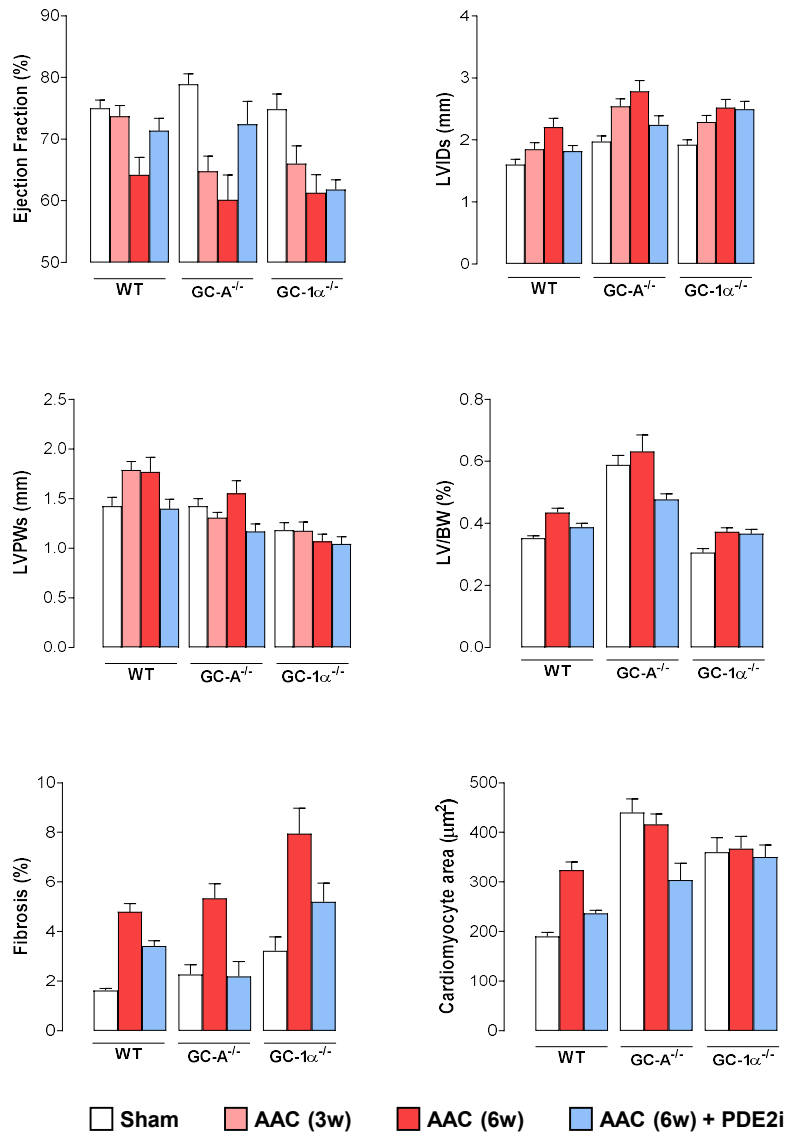

**Figure S6. Comparison of the effects of BAY 60-7550 across genotypes following pressure overload.** Echocardiographic indices of heart structure & function, cardiac fibrosis, and cardiomyocyte size in sham mice and animals undergoing abdominal aortic constriction (AAC) for 3 weeks (3w) or 6 weeks (6w) in the absence and presence of BAY 60-7550 (10mg/kg/day; p.o.; initiated at 3w). Data are expressed as mean±sem. n=6-12.



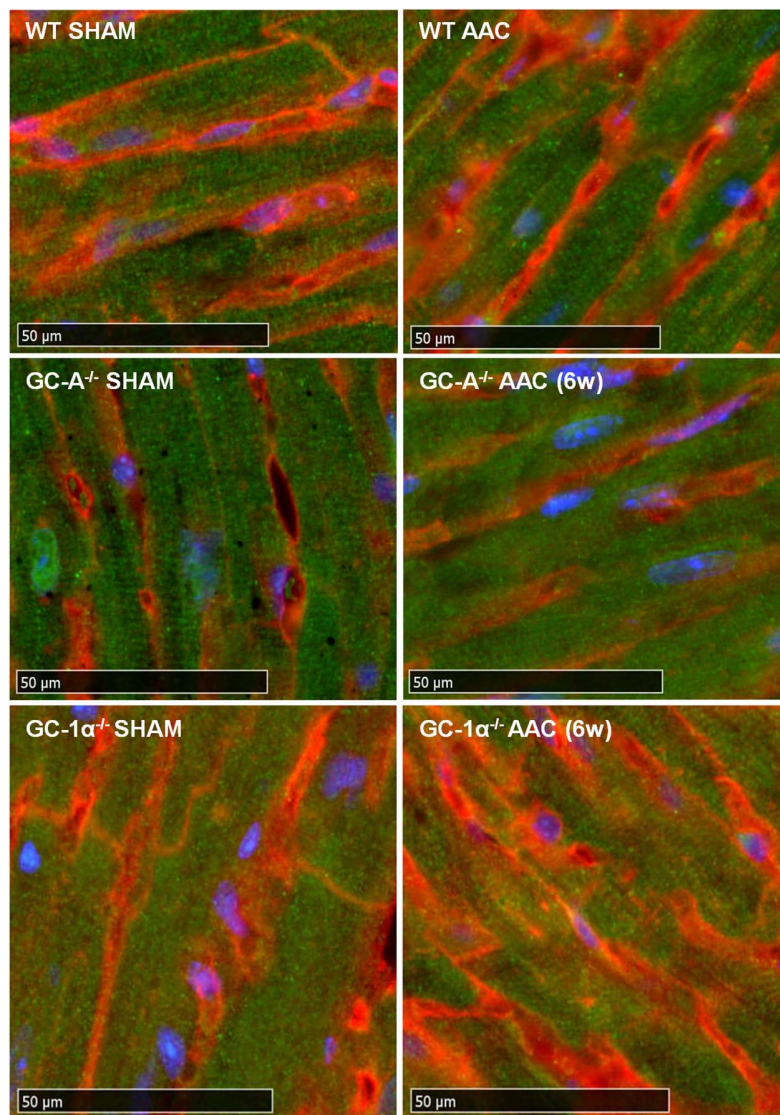

**Figure S7. The cellular localization of PDE2 does not change overtly in response to pressure overload.** Representative images of wheatgerm agglutinin (cell membrane, red) and PDE2 (green) stained heart sections from wild type (WT), GC-A<sup>-/-</sup> and GC-1α<sup>-/-</sup> sham mice and animals undergoing abdominal aortic constriction (AAC) for 6 weeks.



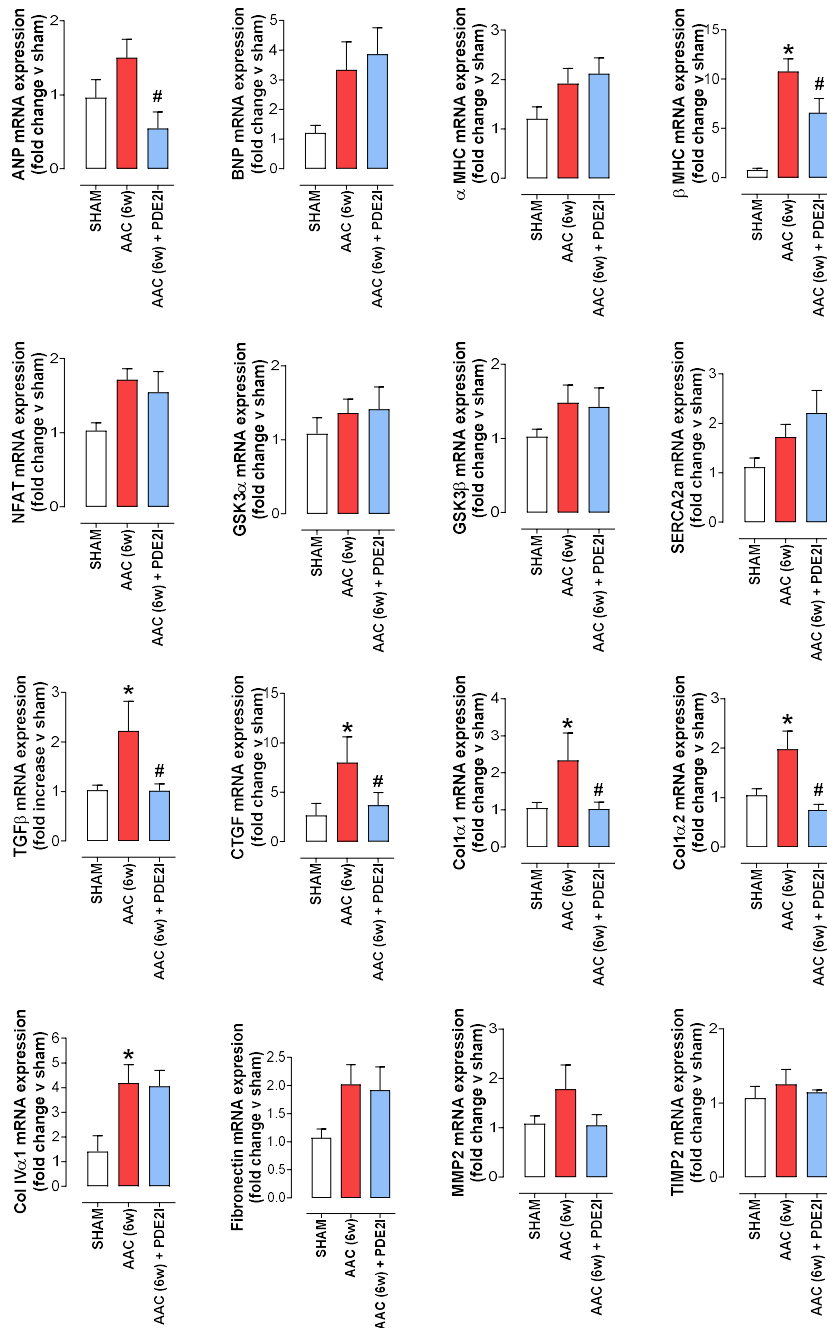

**Figure S8. Expression of pro-hypertrophic and pro-fibrotic markers is diminished by PDE2i following AAC.** Quantitate PCR analysis of an array of established pro-hypertrophic and pro-fibrotic markers in whole heart homogenates from sham mice or animals subjected to abdominal aortic constriction (AAC) for 6 weeks in the absence and presence of BAY 60-7550 (10 mg/kg/day; p.o.; initiated at 3w). Data are expressed as mean $\pm$ sem with analysis by one-way ANOVA with Bonferroni post-hoc test. \*p<0.05 v sham, #p<0.05 v AAC (6w). n=6.

**Table S1.** Primer sequences for genotyping

| <b>Gene target</b>                                | <b>Primer sequence (5'-3')</b>                                   |
|---------------------------------------------------|------------------------------------------------------------------|
| <i>WT (GC-1<math>\alpha</math><sup>+/+</sup>)</i> | Forward: TTACCCCAGTAGCCATTTCC<br>Reverse: CTCAGCTTCCCCAACCTCT    |
| <i>GC-1<math>\alpha</math><sup>-/-</sup></i>      | Forward: AGGTAGCCGGATCAAGCGTAT<br>Reverse: GATGGATTGCACGCAGGTTCT |
| <i>WT (GC-A<sup>+/+</sup>)</i>                    | Forward: GCATGGTTCAGCTCTAAGAC<br>Reverse: CCTTCAGTTATCTACATCTGC  |
| <i>GC-A<sup>-/-</sup></i>                         | Forward: CTAACCCTGTGAACTGTAAGC<br>Reverse: CCTTCAGTTATCTACATCTGC |

**Table S2.** Primer sequences for qPCR analysis

| <b>Gene target</b>                          | <b>Primer sequence (5'-3')</b>                                           |
|---------------------------------------------|--------------------------------------------------------------------------|
| <i>PDE2</i>                                 | Forward: ATCTTTGCCTTGTTTATTTCTG<br>Reverse: CAGCCAGCACAGATTTTCG          |
| <i>ANP</i>                                  | Forward: GGATTTCAAGAACCTGCTAGACC<br>Reverse: GCAGAGCCCTCAGTTTGCT         |
| <i>BNP</i>                                  | Forward: TGGGCTGTAACGCACTGAA<br>Reverse: TGTTGTGGCAAGTTTGTGCTT           |
| <i><math>\alpha</math>MHC</i>               | Forward: GCCCAGTACCTCCGAAAGTC<br>Reverse: GCCTTAACATACTCCTCCTTGTC        |
| <i><math>\beta</math>MHC</i>                | Forward: ACTGTCAACACTAAGAGGGTCA<br>Reverse: TTGGATGATTTGATCTTCCAGGG      |
| <i>Collagen Type 1 <math>\alpha</math>1</i> | Forward: TCTGACTGGAAGAGCGGAGAG<br>Reverse: AGACGGCTGAGTAGGGAACA          |
| <i>Collagen Type 1 <math>\alpha</math>2</i> | Forward: TGGATACGCGGACTCTGTTG<br>Reverse: CCCTTTCGTA CTGATCCCGATT        |
| <i>Collagen Type 4 <math>\alpha</math>1</i> | Forward: CTGGAGAAAAGGGCCAGAT<br>Reverse: TCCTTAACTTGTGCCTGTCC            |
| <i>CTGF</i>                                 | Forward: GGGCCTCTTCTGCGATTC<br>Reverse: ATCCAGGCAAGTGCATTGGTA            |
| <i>Fibronectin</i>                          | Forward: CCGGTGGCTGTCACTCAGA<br>Reverse: CCGTTCCTACTGCTGATTTATC          |
| <i>GSK3<math>\alpha</math></i>              | Forward: GGAGAAGAAGGACGAGCTGTA<br>Reverse: TGTCAGGGTCCACAAGCAAA          |
| <i>GSK3<math>\beta</math></i>               | Forward: CAAAAGGAGTGAAAAGCCAAGAG<br>Reverse: TTGCTGCCATCTTTATCTCTGCT     |
| <i>MMP-2</i>                                | Forward: GACAAGTTCTGGAGATACAATGAAGTG<br>Reverse: CAGGTTATCAGGGATGGCATTCC |
| <i>NFATc3</i>                               | Forward: AACCTATCGAGTGTTCCCA<br>Reverse: TCCCGGTCAGTCTTTGCTTC            |
| <i>NF-<math>\kappa</math>B</i>              | Forward: CCTACGGA ACTGGGCAAATGT<br>Reverse: TCCCCTCTGTTTTGGTTGCT         |
| <i>RPL-19</i>                               | Forward: GCTTGCCTCTAGTGTCTCTCC<br>Reverse: TTGGCGATTTTATTGGTCTCA         |
| <i>SERCA-2</i>                              | Forward: TGGAACCTTTGCCGCTCATT<br>Reverse: CAGAGGCTGGTAGATGTGTT           |
| <i>TGF-<math>\beta</math></i>               | Forward: TCAGACATTCGGGAAGCAGT<br>Reverse: GCCCTGTATTCCGTCTCCTTG          |
| <i>TIMP-2</i>                               | Forward: GATTCAGTATGAGATCAAGCAGATAAAGA<br>Reverse: GCGAGACCCCGCACACT     |
| <i><math>\alpha</math>SMA</i>               | Forward: ACTACTGCCGAGCGTGA<br>Reverse: ATAGGTGGTTTCGTGGATGC              |
| <i><math>\beta</math>-actin</i>             | Forward: CACAGCTTCTTTGCAGCTCCTT<br>Reverse: TCAGGATACCTCTCTTGCTCT        |

**Table S3.** Effect of BAY 60-7550 (10 mg/kg/day) on mean arterial blood pressure (MABP) in pressure overload (AAC; 6w)-induced HF.

|                    | WT           |                 |                         | GC-A <sup>-/-</sup> |                 |                         | GC-1 $\alpha$ <sup>-/-</sup> |                 |                         |
|--------------------|--------------|-----------------|-------------------------|---------------------|-----------------|-------------------------|------------------------------|-----------------|-------------------------|
|                    | <i>Sham</i>  | <i>AAC (6w)</i> | <i>AAC (6w) + PDE2i</i> | <i>Sham</i>         | <i>AAC (6w)</i> | <i>AAC (6w) + PDE2i</i> | <i>Sham</i>                  | <i>AAC (6w)</i> | <i>AAC (6w) + PDE2i</i> |
| <b>MABP (mmHg)</b> | 97.7<br>±1.9 | *114.1<br>±3.4  | *113.1<br>±1.5          | 101.5<br>±2.9       | *118.7<br>±3.9  | *119.3<br>±1.3          | 107.4<br>±3.7                | *117.1<br>±2.0  | *115.5<br>±2.8          |

\*p<0.05 v sham, n=6-12

**Table S4.** Effect of BAY 60-7550 (10 mg/kg/day) on heart rate (HR) in pressure overload (AAC; 6w)- and isoproterenol (ISO; 2w)- induced HF.

|                        | <i>Sham</i> | <i>AAC (6w)</i> | <i>AAC (6w) + PDE2i</i> | <i>Sham</i> | <i>ISO (2w)</i> | <i>ISO (2w) + PDE2i</i> |
|------------------------|-------------|-----------------|-------------------------|-------------|-----------------|-------------------------|
| <b><i>HR (bpm)</i></b> | 529±48      | 524±11          | 514±28                  | 515±32      | 631±25*         | 663±17*                 |

\*p<0.05 v sham, n=6-12
